# Supplementary material for: Efficiency gains for thermally coupled solar hydrogen production in extreme cold
Source: Royal Society of Chemistry journal article supplement (doi:10.1039/d1ee00650a), 2021-01-01
Supplement: d1ee00650a2.xlsx [file d1ee00650a2.xlsx]

## Sheet: Readme
Supplementary information for Kölbach, Rehfeld and May, 2021 (submitted)
The attached sheet gives names, locations, general information and results for the high-latitude and high-altitude research stations considered in the main manuscript.
Location details and information on Antarctic stations were collected from the table 'Research Stations in Antarctica' at https://en.wikipedia.org/wiki/Research_stations_in_Antarctica#List_of_research_stations (last access 28.11.2020).
The collection of Arctic stations was inspired by the table 'List of research stations in the Arctic' from https://en.wikipedia.org/wiki/List_of_research_stations_in_the_Arctic (last access: 27.11.2020).
Details were also collected from individual websites and manuscripts (e.g., for the NEEM field camp, Madsen et al. 2016).
For details on the derivation of the insolation values and its uncertainty, the number days above the temperature threshold, and the estimated area for 10kg of H2 production please refer to the methods described in the main manuscript.

## Sheet: Stations
Station Name	Country	Latitude (°N)	Longitude (°E)	Annual insolation on days above 253K (Jyr-1m-2)	Uncertainty of the annual insolation on days above 253K (Jyr-1m-2)	Annual insolation on days above 273K (Jyr-1m-2)	Uncertainty of the annual insolation on days above 273K (Jyr-1m-2)	Number of days above 273K	Number of days above 253K	Mean annual temperature in 2019 (K)	Estimated module area for 10kg of solar hydrogen (m2)	Elevation (m)	Link
Aboa	Finland	-73.0423	-13.4073	3.77771e+09	-3.77771e+08	0	0	0	225	256.365	2.62
Amundsen–Scott South Pole	United States	-90	179	4.93056e+07	-4.93056e+06	0	0	0	2	228.148	200.58
Arctowski	Poland	-62.1601	-58.4732	3.20793e+09	-3.20793e+08	1.39666e+09	-1.39666e+08	122	365	271.27	3.08
Arrival Heights Laboratory[12]	New Zealand	-77.8306	166.661	3.26472e+09	-3.26472e+08	0	0	0	239	256.838	3.03
Arrival Heights Satellite Station[12]	New Zealand	-77.83	166.662	3.26472e+09	-3.26472e+08	0	0	0	239	256.838	3.03
Artigas	Uruguay	-62.1844	-58.9039	3.18025e+09	-3.18025e+08	1.62108e+09	-1.62108e+08	149	365	271.704	3.11
Arturo Prat	Chile	-62.4789	-59.6644	3.16241e+09	-3.16241e+08	1.51868e+09	-1.51868e+08	133	365	271.575	3.13
Beaver Lake[13]	Australia	-70.7951	68.1689	4.0502e+09	-4.0502e+08	0	0	0	211	255.547	2.44
Belgrano II	Argentina	-77.8737	-34.6276	3.5991e+09	-3.5991e+08	2.55304e+07	-2.55304e+06	1	259	258.526	2.75
Bellingshausen	Russia	-62.1986	-58.9605	3.18025e+09	-3.18025e+08	1.62108e+09	-1.62108e+08	149	365	271.704	3.11
Bharati	India	-69.408	76.1874	4.12888e+09	-4.12888e+08	5.93994e+07	-5.93994e+06	3	285	259.98	2.4
Brown	Argentina	-64.8955	-62.8709	3.92413e+09	-3.92413e+08	0	0	0	356	263.927	2.52
Cámara	Argentina	-62.5948	-59.9186	3.13281e+09	-3.13281e+08	1.41392e+09	-1.41392e+08	124	365	271.473	3.16
Carvajal(ex Station T)	Chile	-67.7612	-68.9144	3.62215e+09	-3.62215e+08	4.76885e+08	-4.76885e+07	34	360	267.992	2.73
Casey	Australia	-66.2825	110.527	3.9376e+09	-3.9376e+08	2.36521e+08	-2.36521e+07	13	348	264.052	2.51
Collins	Chile	-62.1692	-58.8519	3.19405e+09	-3.19405e+08	1.48285e+09	-1.48285e+08	134	365	271.486	3.1
Comandante Ferraz	Brazil	-62.0854	-58.3915	3.15307e+09	-3.15307e+08	9.81322e+08	-9.81322e+07	92	365	270.988	3.14
Concordia	Italy France	-75.0998	123.332	0	0	0	0	0	0	223.598	∞
Dallmann	Germany	-62.2383	-58.6678	3.19405e+09	-3.19405e+08	1.48285e+09	-1.48285e+08	134	365	271.486	3.1
Davis	Australia	-68.5767	77.9675	3.93595e+09	-3.93595e+08	2.83275e+08	-2.83275e+07	14	316	262.721	2.51
Deception	Argentina	-62.9753	-60.6978	3.14182e+09	-3.14182e+08	1.88817e+09	-1.88817e+08	161	365	272.004	3.15
Dirck Gerritsz Laboratory	Netherlands	-67.569	-68.1246	3.43895e+09	-3.43895e+08	2.05078e+07	-2.05078e+06	1	359	266.098	2.88
Dumont d'Urville	France	-66.6628	140.002	4.36324e+09	-4.36324e+08	3.22756e+07	-3.22756e+06	2	282	259.545	2.27
E Base	South Africa	-70.3	-2.43333	3.73233e+09	-3.73233e+08	2.17574e+07	-2.17574e+06	1	271	259.849	2.65
Eco-Nelson	Czechoslovakia Czech Republic	-62.2463	-58.9823	3.18025e+09	-3.18025e+08	1.62108e+09	-1.62108e+08	149	365	271.704	3.11
Eduardo FreiandVilla Las Estrellas	Chile	-62.1931	-58.982	3.18025e+09	-3.18025e+08	1.62108e+09	-1.62108e+08	149	365	271.704	3.11
Elichiribehety(ex Station D)	Uruguay	-63.4025	-56.9907	3.77259e+09	-3.77259e+08	7.1401e+08	-7.1401e+07	46	365	267.555	2.62
Escudero	Chile	-62.2014	-58.9624	3.18025e+09	-3.18025e+08	1.62108e+09	-1.62108e+08	149	365	271.704	3.11
Esperanza	Argentina	-63.3975	-56.9978	3.77259e+09	-3.77259e+08	7.1401e+08	-7.1401e+07	46	365	267.555	2.62
Fossil Bluff(ex Station KG)[15]	United Kingdom	-71.3234	-68.2877	3.98954e+09	-3.98954e+08	2.56212e+07	-2.56212e+06	1	320	262.874	2.48
German Antarctic Receiving Station	Germany	-63.3209	-57.9006	3.55468e+09	-3.55468e+08	4.25596e+08	-4.25596e+07	34	365	268.747	2.78
Gondwana	Germany	-74.6354	164.222	3.63516e+09	-3.63516e+08	0	0	0	235	257.449	2.72
González Videla	Chile	-64.824	-62.8571	3.55455e+09	-3.55455e+08	3.8811e+08	-3.8811e+07	19	365	267.702	2.78
Great Wall	China	-62.2168	-58.9619	3.18025e+09	-3.18025e+08	1.62108e+09	-1.62108e+08	149	365	271.704	3.11
Guillermo Mann	Chile	-62.4699	-60.7713	3.08801e+09	-3.08801e+08	1.63882e+09	-1.63882e+08	146	365	271.885	3.2
Halley	United Kingdom	-75.6125	-26.66	3.25957e+09	-3.25957e+08	5.07355e+07	-5.07355e+06	2	250	258.478	3.03
Jang Bogo	South Korea	-74.624	164.229	3.72808e+09	-3.72808e+08	0	0	0	179	254.225	2.65
Jinnah	Pakistan	-70.4	25.75	4.05353e+09	-4.05353e+08	3.83245e+07	-3.83245e+06	2	255	258.058	2.44
Juan Carlos Primero	Spain	-62.6631	-60.388	3.11986e+09	-3.11986e+08	1.56771e+09	-1.56771e+08	138	365	271.682	3.17
Jubany(renamed Carlini)	Argentina	-62.2383	-58.6678	3.19405e+09	-3.19405e+08	1.48285e+09	-1.48285e+08	134	365	271.486	3.1
Julio Ripamonti	Chile	-62.2101	-58.9355	3.18025e+09	-3.18025e+08	1.62108e+09	-1.62108e+08	149	365	271.704	3.11
King Sejong	South Korea	-62.2228	-58.7883	3.19405e+09	-3.19405e+08	1.48285e+09	-1.48285e+08	134	365	271.486	3.1
Kohnen	Germany	-75.0019	0.066792	2.66653e+08	-2.66653e+07	0	0	0	8	233.895	37.09
Kunlun	China	-80.4173	77.1164	0	0	0	0	0	0	221.403	∞
Law	Romania	-69.3736	76.3716	3.89509e+09	-3.89509e+08	2.29653e+08	-2.29653e+07	13	331	263.053	2.54
Lenie	United States	-62.1784	-58.4462	3.20793e+09	-3.20793e+08	1.39666e+09	-1.39666e+08	122	365	271.27	3.08
Machu Picchu	Peru	-62.0915	-58.4699	3.15307e+09	-3.15307e+08	9.81322e+08	-9.81322e+07	92	365	270.988	3.14
Maitri	India	-70.7666	11.7315	4.24523e+09	-4.24523e+08	1.6274e+08	-1.6274e+07	7	299	260.652	2.33
Maldonado	Ecuador	-62.4491	-59.7414	3.16241e+09	-3.16241e+08	1.51868e+09	-1.51868e+08	133	365	271.575	3.13
Marambio	Argentina	-64.241	-56.6268	3.77957e+09	-3.77957e+08	4.90656e+08	-4.90656e+07	23	365	266.88	2.62
Matienzo	Argentina	-64.9757	-60.0715	4.15513e+09	-4.15513e+08	4.79035e+08	-4.79035e+07	21	348	264.19	2.38
Mawson	Australia	-67.6032	62.8742	3.85179e+09	-3.85179e+08	1.08398e+08	-1.08398e+07	6	327	262.066	2.57
McMurdo	United States	-77.8463	166.668	3.26472e+09	-3.26472e+08	0	0	0	239	256.838	3.03
Melchior	Argentina	-64.3257	-62.9761	3.21773e+09	-3.21773e+08	8.60046e+08	-8.60046e+07	56	365	270.161	3.07
Mendel	Czech Republic	-63.8006	-57.8822	3.92442e+09	-3.92442e+08	2.92678e+08	-2.92678e+07	12	356	265.475	2.52
Mirny	Russia	-66.5531	93.0097	4.35239e+09	-4.35239e+08	8.75327e+07	-8.75327e+06	4	346	263.086	2.27
Neumayer III	Germany	-70.6773	-8.2716	3.90074e+09	-3.90074e+08	0	0	0	240	257.619	2.54
Novolazarevskaya	Russia	-70.7768	11.8224	4.24523e+09	-4.24523e+08	1.6274e+08	-1.6274e+07	7	299	260.652	2.33
Oasis(renamedDobrowolski)	Soviet Union Poland	-66.2667	100.733	4.40238e+09	-4.40238e+08	1.31637e+08	-1.31637e+07	6	295	260.137	2.25
Orcadas	Argentina	-60.7381	-44.7381	3.30315e+09	-3.30315e+08	1.41429e+09	-1.41429e+08	125	365	269.699	2.99
Palmer	United States	-64.7742	-64.0527	3.53723e+09	-3.53723e+08	9.63129e+08	-9.63129e+07	61	365	269.513	2.8
Petrel	Argentina	-63.4779	-56.2288	3.47981e+09	-3.47981e+08	5.69431e+08	-5.69431e+07	39	365	267.976	2.84
Primavera	Argentina	-64.1558	-60.9552	3.76984e+09	-3.76984e+08	2.44377e+08	-2.44377e+07	10	365	266.746	2.62
Progress	Soviet Union Russia	-69.3736	76.3717	3.89509e+09	-3.89509e+08	2.29653e+08	-2.29653e+07	13	331	263.053	2.54
Risopatrón	Chile	-62.3783	-59.7008	3.16241e+09	-3.16241e+08	1.51868e+09	-1.51868e+08	133	365	271.575	3.13
Rothera(ex Station R)[24]	United Kingdom	-67.5684	-68.1258	3.47045e+09	-3.47045e+08	5.27675e+07	-5.27675e+06	3	358	266.326	2.85
San Martín	Argentina	-68.13	-67.1013	3.73641e+09	-3.73641e+08	4.43911e+08	-4.43911e+07	17	354	265.236	2.65
SANAE IV	South Africa	-71.6727	-2.84057	3.97431e+09	-3.97431e+08	0	0	0	217	255.587	2.49
Scott Base	New Zealand	-77.8491	166.768	3.26472e+09	-3.26472e+08	0	0	0	239	256.838	3.03
Shirreff	United States	-62.4703	-60.771	3.08801e+09	-3.08801e+08	1.63882e+09	-1.63882e+08	146	365	271.885	3.2
Signy(ex Station H)[26]	United Kingdom	-60.7081	-45.5949	3.29286e+09	-3.29286e+08	1.02519e+09	-1.02519e+08	91	365	269.456	3
Syowa	Japan	-69.0044	39.5817	3.99397e+09	-3.99397e+08	3.05909e+08	-3.05909e+07	14	345	263.775	2.48
St. Kliment Ohridski	Bulgaria	-62.6414	-60.3647	3.1378e+09	-3.1378e+08	1.581e+09	-1.581e+08	139	365	271.632	3.15
Station A[27]	United Kingdom	-64.8253	-63.4937	3.56264e+09	-3.56264e+08	8.61511e+08	-8.61511e+07	52	365	269.123	2.78
Svea	Sweden	-74.5833	-11.2167	3.31812e+09	-3.31812e+08	0	0	0	132	249.17	2.98
Taishan[42]	China	-73.8639	76.9747	5.21225e+08	-5.21225e+07	0	0	0	18	239.926	18.97
Tor	Norway	-71.8895	5.15954	2.82174e+09	-2.82174e+08	0	0	0	96	246.311	3.5
Troll	Norway	-72.0117	2.53514	3.53936e+09	-3.53936e+08	0	0	0	136	248.451	2.79
Union Glacier	Chile	-79.7694	83.2617	0	0	0	0	0	0	221.402	∞
Vanda	New Zealand	-77.5167	161.667	3.34661e+09	-3.34661e+08	0	0	0	123	249	2.96
Vechernyaya[43]	Belarus	-67.6591	46.1581	4.27298e+09	-4.27298e+08	0	0	0	286	259.259	2.31
Vernadsky(ex Station F)	Ukraine United Kingdom	-65.2458	-64.2578	3.23917e+09	-3.23917e+08	9.59081e+08	-9.59081e+07	83	365	270.408	3.05
Vostok	Soviet Union Russia	-78.4639	106.838	0	0	0	0	0	0	221.618	∞
Wasa	Sweden	-73.0399	-13.3986	3.77771e+09	-3.77771e+08	0	0	0	225	256.365	2.62
Yelcho	Chile	-64.8759	-63.5837	3.29934e+09	-3.29934e+08	6.98884e+08	-6.98884e+07	42	365	269.056	3
Zhongshan	China	-69.3736	76.3717	3.89509e+09	-3.89509e+08	2.29653e+08	-2.29653e+07	13	331	263.053	2.54
Zucchelli	Italy	-74.6942	164.114	3.55573e+09	-3.55573e+08	0	0	0	225	257.227	2.78
Abisko	Sweden	68.3502	18.83	3.02018e+09	-3.02018e+08	2.09804e+09	-2.09804e+08	147	363	239.199	3.27		https://polar.se/en/research-in-abisko/
Barrow	USA	71.323	156.611	2.86071e+09	-2.86071e+08	1.64927e+09	-1.64927e+08	118	245	228.148	3.46	11	https://www.esrl.noaa.gov/gmd/obop/brw/
Ny-Alesund	Germany/France	78.925	11.9222	2.79388e+09	-2.79388e+08	1.59123e+09	-1.59123e+08	102	354	267.706	3.54		https://www.awi.de/en/expedition/stations/awipev-arctic-research-base.html
Myvatn	Iceland	65.6	-17	2.6677e+09	-2.6677e+08	2.12479e+09	-2.12479e+08	213	365	243.385	3.71		https://en.wikipedia.org/wiki/M%C3%BDvatn
Samoylov	Russia	72.3683	126.475	2.656e+09	-2.656e+08	1.72062e+09	-1.72062e+08	126	235	224.767	3.72		https://de.wikipedia.org/wiki/Forschungsstation_Insel_Samoilow
EGRIP	Multiple	75.63	-35.99	3.33029e+09	-3.33029e+08	0	0	0	146	267.145	2.97	2700	https://eastgrip.org/
Wrangel Island	Russia	71.2333	-179.417	2.65592e+09	-2.65592e+08	1.52715e+09	-1.52715e+08	113	291	273.733	3.72
Toolik	Canada	68.6307	-149.611	3.01187e+09	-3.01187e+08	2.02567e+09	-2.02567e+08	137	303	265.797	3.28		https://toolik.alaska.edu/
Inuvik		68.3608	-133.73	3.19078e+09	-3.19078e+08	2.33598e+09	-2.33598e+08	158	299	249.665	3.1		http://cnnro.ca/western-arctic-research-centre/
Summit	Greenland (USA)	72.5796	-38.4592	2.98262e+09	-2.98262e+08	0	0	0	124	267.236	3.32		https://en.wikipedia.org/wiki/Summit_Camp
Schneefernerhaus	Germany	47.4166	10.9796	4.4776e+09	-4.4776e+08	4.00015e+09	-4.00015e+08	295	365	262.276	2.21	2656	https://schneefernerhaus.de/
Jungfraujoch	Switzerland	46.5472	7.98056	5.30905e+09	-5.30905e+08	3.28539e+09	-3.28539e+08	182	365	265.418	1.86	3572	https://en.wikipedia.org/wiki/Sphinx_Observatory
Paranal	ESO	-24.6272	-70.4039	8.95722e+09	-8.95722e+08	8.95722e+09	-8.95722e+08	365	365	273.541	1.1	2635	https://www.eso.org/public/teles-instr/paranal-observatory/
